# Supplementary material
Source: HighWire-hosted journal article supplement (https://erj.ersjournals.com/content/60/3/2200754)

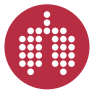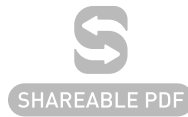

# Reply: Identification of coronavirus particles by electron microscopy: a complementary tool for deciphering COVID-19

Sophia Havaki<sup>1,5</sup>, Konstantinos Evangelou<sup>1,5</sup>, Koralia Paschalaki<sup>2</sup>, Russell Petty<sup>3</sup>, Peter J. Barnes<sup>2</sup> and Vassilis G. Gorgoulis<sup>1,3,4</sup>

<sup>1</sup>Molecular Carcinogenesis Group, Department of Histology and Embryology, Medical School, National and Kapodistrian University of Athens, Athens, Greece. <sup>2</sup>National Heart and Lung Institute, Imperial College London, London, UK. <sup>3</sup>Ninewells Hospital and Medical School, University of Dundee, Dundee, UK. <sup>4</sup>Faculty Institute for Cancer Sciences, Manchester Academic Health Sciences Centre, University of Manchester, Manchester, UK. <sup>5</sup>Contributed equally.

Corresponding author: Vassilis G. Gorgoulis ([vgorg@med.uoa.gr](mailto:vgorg@med.uoa.gr))

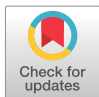

Shareable abstract (@ERSpublications)

**Identification of coronavirus particles by electron microscopy: a complementary tool for deciphering COVID-19** <https://bit.ly/3Kk5PT8>

**Cite this article as:** Havaki S, Evangelou K, Paschalaki K, *et al.* Reply: Identification of coronavirus particles by electron microscopy: a complementary tool for deciphering COVID-19. *Eur Respir J* 2022; 60: 2200754 [DOI: 10.1183/13993003.00754-2022].

This single-page version can be shared freely online.

Copyright ©The authors 2022.

This version is distributed under the terms of the Creative Commons Attribution Non-Commercial Licence 4.0. For commercial reproduction rights and permissions contact [permissions@ersnet.org](mailto:permissions@ersnet.org)

Received: 8 April 2022  
Accepted: 13 April 2022

*Reply to C. Dittmayer and M. Laue:*

We thank C. Dittmayer and M. Laue for giving us the opportunity to clarify issues regarding the identification of coronavirus (CV) particles by electron microscopy (EM) demonstrated in our recent publication [1]. We would like to respond to the authors' statements, as follows:

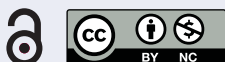

Supplement: inline-supplementary-material-1 [file inline-supplementary-material-1.pdf]
